# Supplementary material for: Mortality, morbidity, and post-operative complications of typhoid intestinal perforations: global systematic review and meta-analysis
Source: bioRxiv or medRxiv preprint supplement (doi:10.1101/2024.06.28.24309663), 2026-06-13
Supplement: Supplementary file [file media-8.pdf]

Previous studies

Identification of new studies via databases and registers

Identification

Studies included in previous version of review (n = 29)

Records identified from:  
Databases (n = 8,031)

Records removed before screening:  
Duplicate records (n = 1,472)

Screening

Records screened  
(n = 6,559)

Records excluded  
(n = 6,202)

Reports sought for retrieval  
(n = 363)

Reports not retrieved  
(n = 3)

Reports assessed for eligibility  
(n = 360)

Reports excluded (n=340):  
Wrong outcome (n=196)  
Case definition not matching or unclear (n=102)  
Wrong population (n=18)  
Wrong result format (n=10)  
Wrong study design (n=9)  
Wrong publication type (n=5)

Reports of new included studies  
(n = 20)

Reports of total included studies  
(n = 46)

Duplicate data (n = 3)

Included
