# Supplementary material for: Mortality, morbidity, and post-operative complications of typhoid intestinal perforations: global systematic review and meta-analysis
Source: bioRxiv or medRxiv preprint supplement (doi:10.1101/2024.06.28.24309663), 2026-06-13
Supplement: Supplementary file [file media-12.pdf]

First author, publication year-outcome group

Conventi, 2018-overall  
Edino, 2004-overall  
Talabi, 2014-survivors  
van der Werf, 1990-overall  
Waqar, 2006-overall

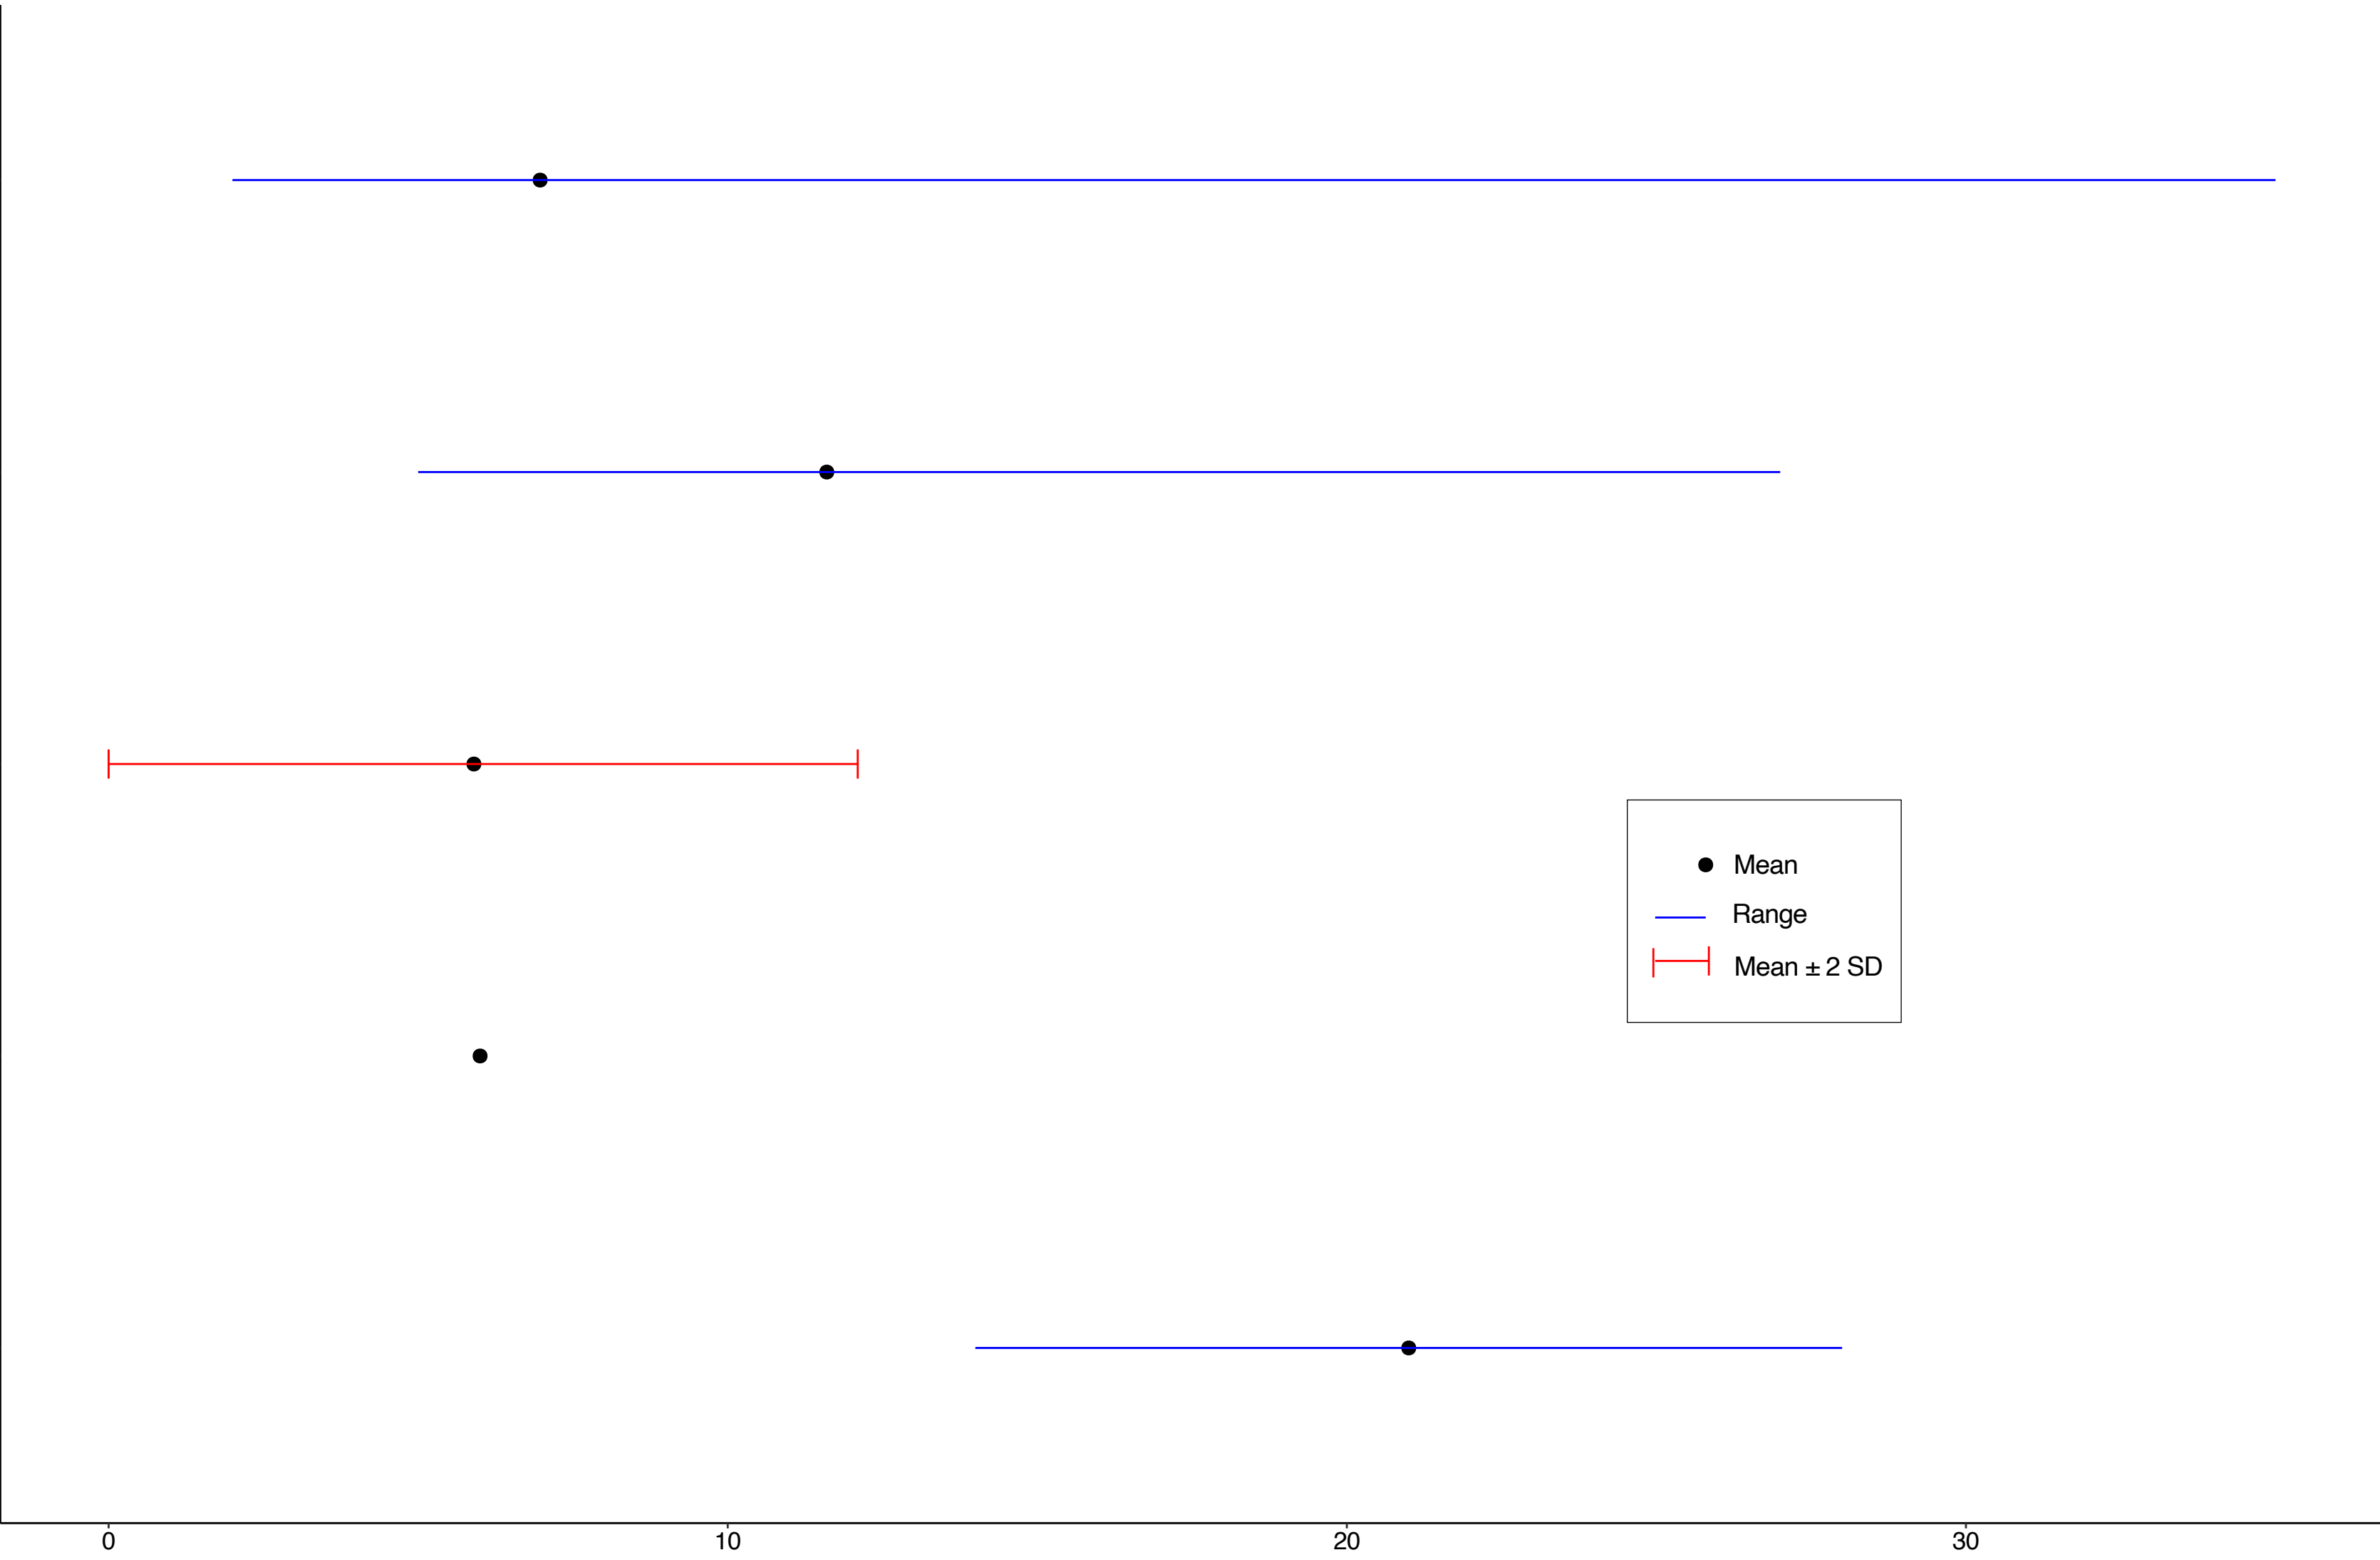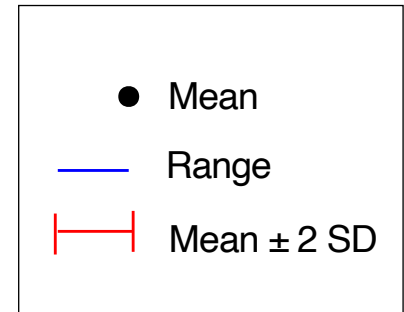

Duration symptom onset to perforation in days
