# Supplementary material for: Mortality, morbidity, and post-operative complications of typhoid intestinal perforations: global systematic review and meta-analysis
Source: bioRxiv or medRxiv preprint supplement (doi:10.1101/2024.06.28.24309663), 2026-06-13

First author, publication year-outcome group

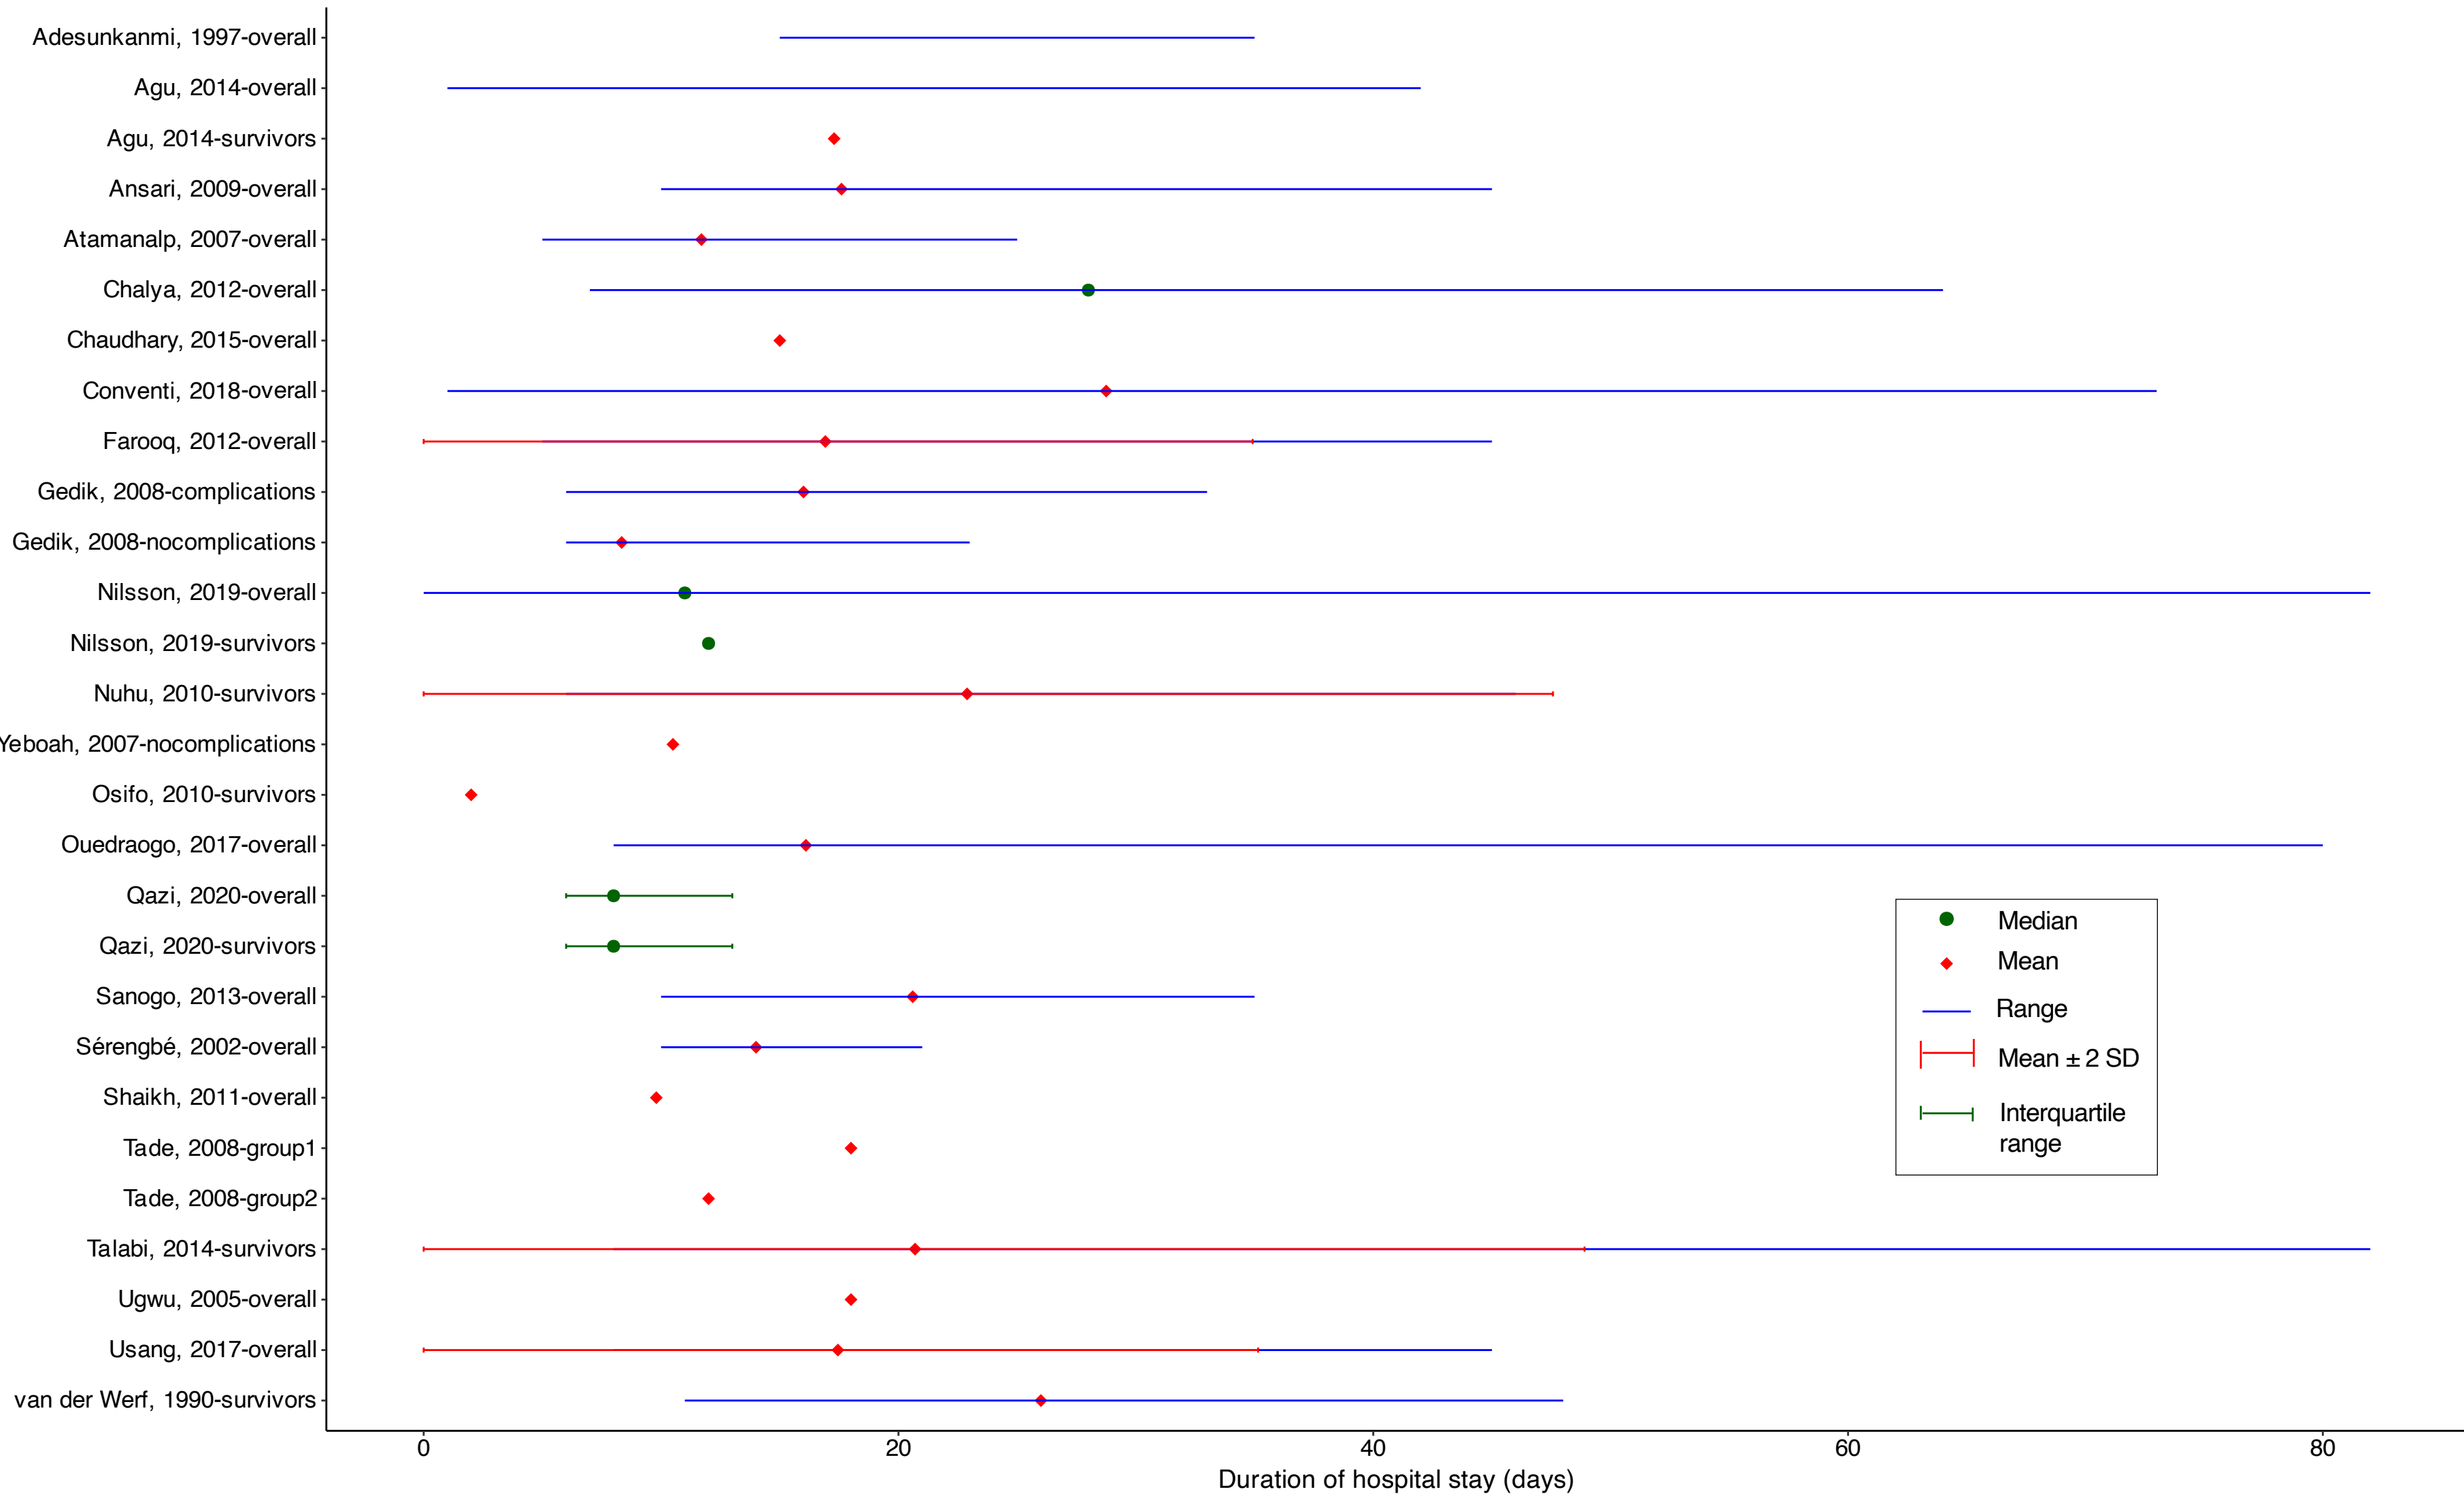

Supplement: Supplementary file [file media-13.pdf]
